# Supplementary material for: Effectiveness of Physical-Literacy-Based Online Education on Indices of Physical Fitness in High-School Adolescents: Intervention Study during the COVID-19 Pandemic Period
Source: MDPI journal article supplement (doi:10.3390/children10101666), 2023-10-08
Supplement: s1 [file s1]

Supplementary file

Original educational videos in Croatian language with English subtitles are available here: <https://pl-hl-nl.kifst.hr/pl/pl-int/>
